# Supplementary material
Source: MDPI journal article supplement (https://www.mdpi.com/2311-553X/6/3/32)
Supplement: s1 [file s1]

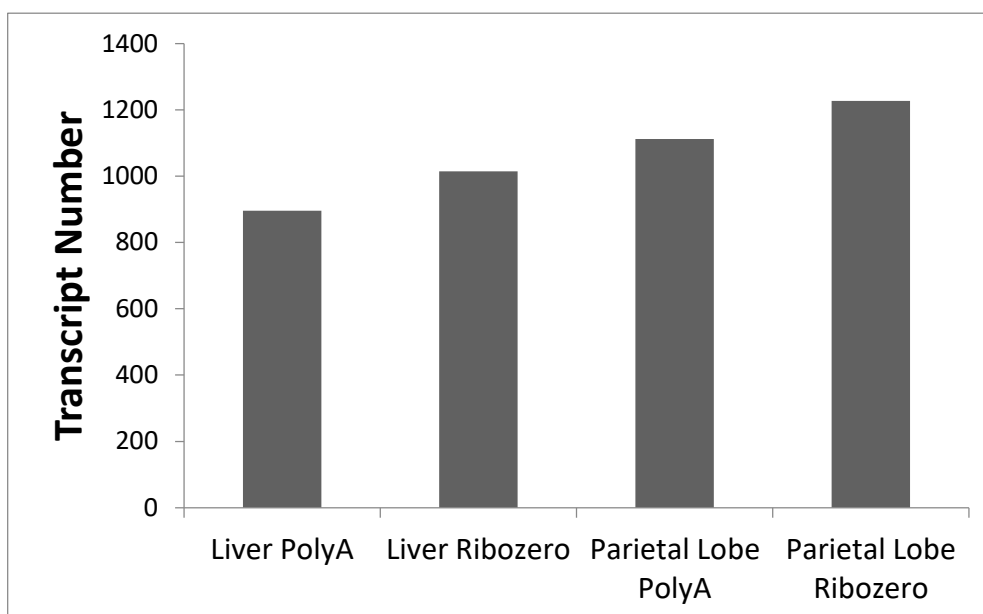

**Figure S1.** Average number of protein-coding transcripts. Bar graph showing the average number of protein-coding transcripts for each tissue and library preparation. Each bar is an average of the two horses.

Table S1: Number of lncRNA Used in Correlation Analysis by Tissue and Library Preparation

| Tissue and Library Preparation | Number of lncRNA Used in Correlation |
|--------------------------------|--------------------------------------|
| Liver PolyA                    | 1934                                 |
| Liver Ribozero                 | 1208                                 |
| Parietal Lobe PolyA            | 2371                                 |
| Parietal Lobe Ribozero         | 1364                                 |

Table S2: lncRNA Removed in Biologic Replicate Correlation, Table S3: raw output from edgeR analysis

| lncRNA Removed in Biologic Replicate Correlation |                       |                          |                          |
|--------------------------------------------------|-----------------------|--------------------------|--------------------------|
| Liver                                            |                       | Parietal Lobe            |                          |
| PolyA                                            | Ribozero              | PolyA                    | Ribozero                 |
| chr7:25389286-25390378                           | chr31:8722887-8723106 | chr1:112301900-112302558 | chr1:21949607-21950018   |
| chr27:34137241-34138781                          |                       | chr10:76657675-76658212  | chr1:112301900-112302558 |
|                                                  |                       | chr31:8722887-8723106    | chr1:158746022-158746364 |
|                                                  |                       | chr31:16560679-16562097  | chr27:5219606-5221622    |
|                                                  |                       |                          | chr31:8722887-8723106    |

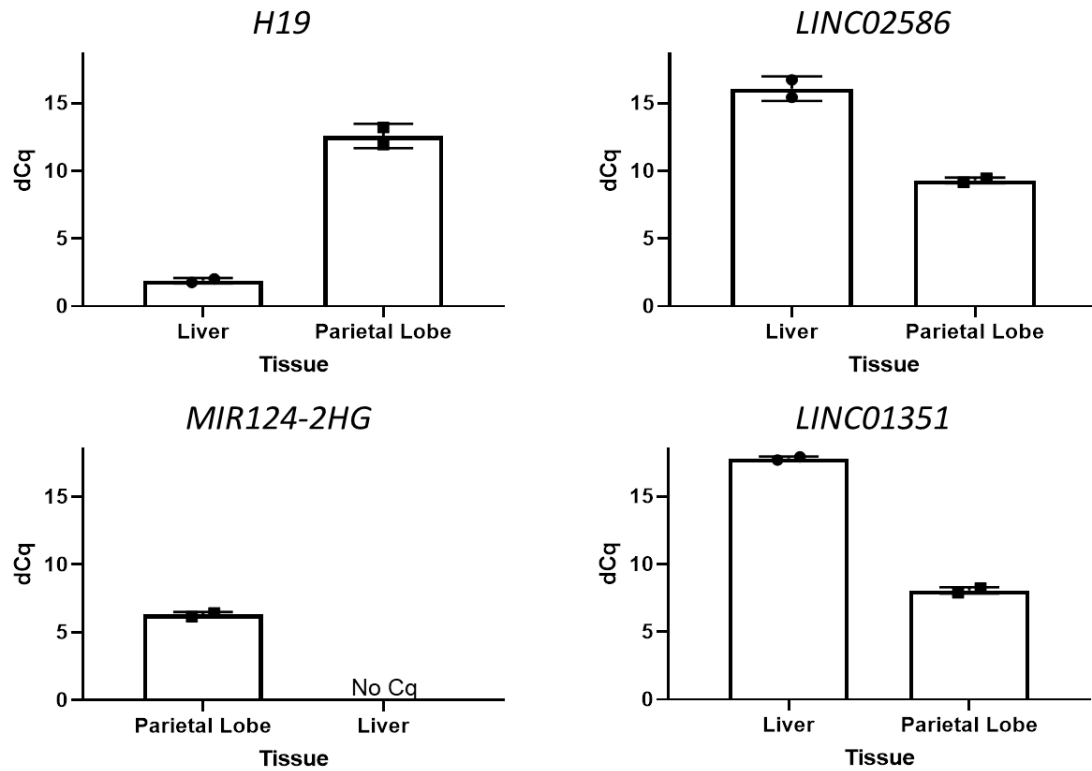

Figure S2: Bar graphs showing delta Cq in parietal lobe and liver for four lncRNA transcripts. Bar graphs showing delta Cq in parietal lobe and liver for four lncRNA transcripts. Each data point represents one horse. *ACTB* was used as the reference gene.

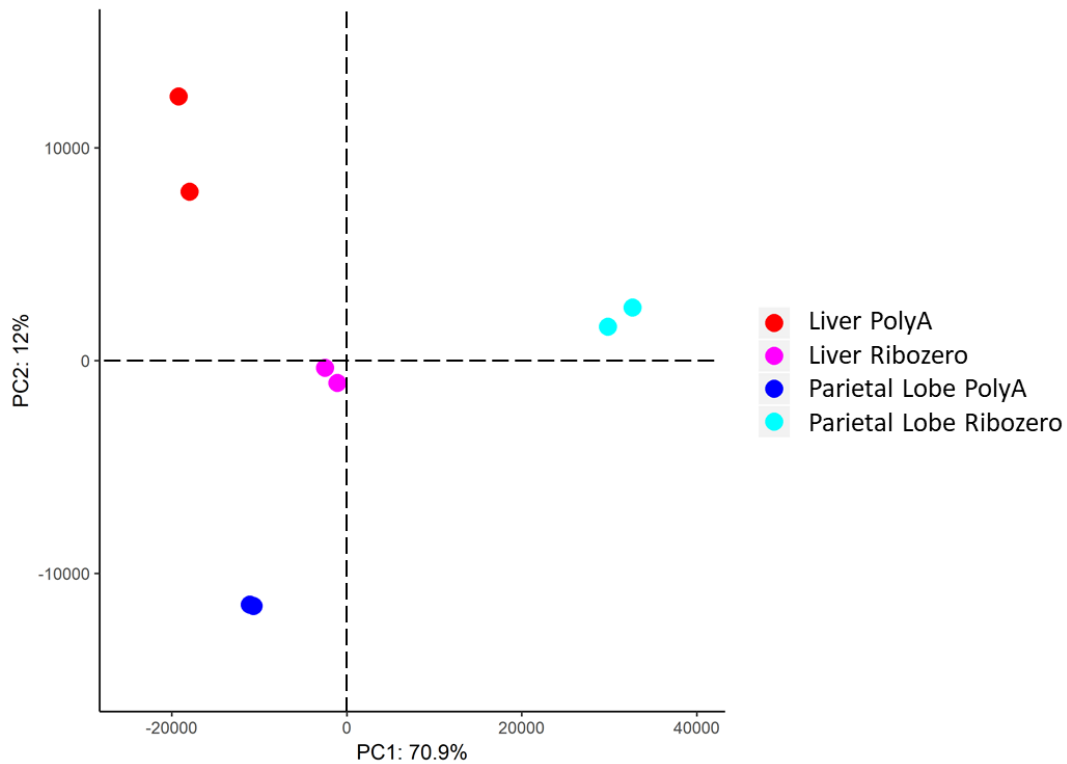

Figure S3: Principle component plot of the lncRNA expression. Principle component plot of the lncRNA expression from each tissue/library preparation for each horse

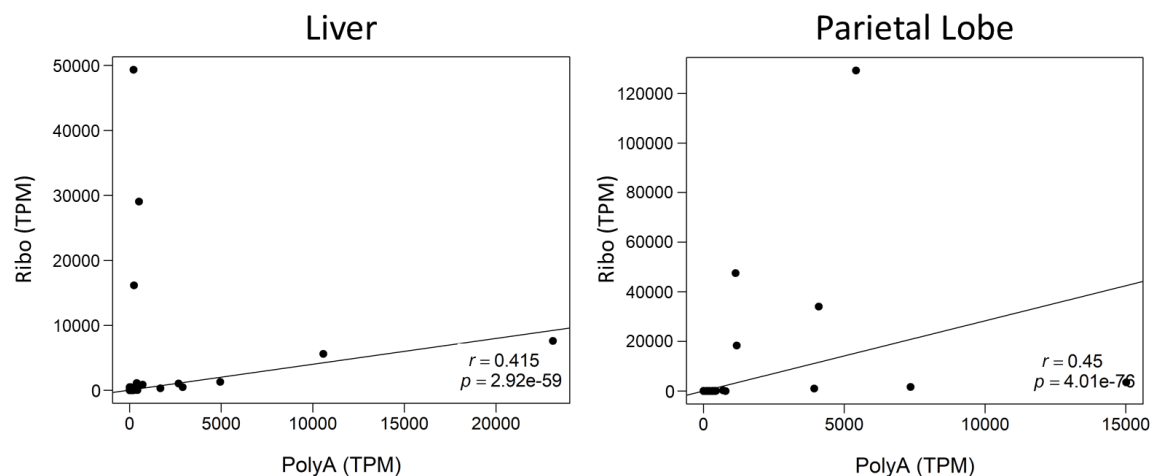

Figure S4: Correlation plots for lncRNA expression in AH2 with annotated transcripts, Correlation plots for lncRNA expression in AH2 with annotated transcripts. The x-axis indicates expression of the individual lncRNA in the poly-A<sup>+</sup> selected library. The y-axis shows expression of the same lncRNAs in the rRNA-depleted library. A) Liver B) Parietal Lobe of the Cerebrum. Spearman correlation (r) and p-value in bottom right corner.

Table S4: lncRNA annotated as snoRNA for each horse, tissue, and library preparation method.

| Horse | Tissue        | Preparation method | lncRNA annotated as snoRNA |
|-------|---------------|--------------------|----------------------------|
| AH1   | Liver         | PolyA              | 178                        |
|       |               | Ribozero           | 180                        |
|       | Parietal Lobe | PolyA              | 201                        |
|       |               | Ribozero           | 178                        |
| AH2   | Liver         | PolyA              | 213                        |
|       |               | Ribozero           | 181                        |
|       | Parietal Lobe | PolyA              | 237                        |
|       |               | Ribozero           | 158                        |

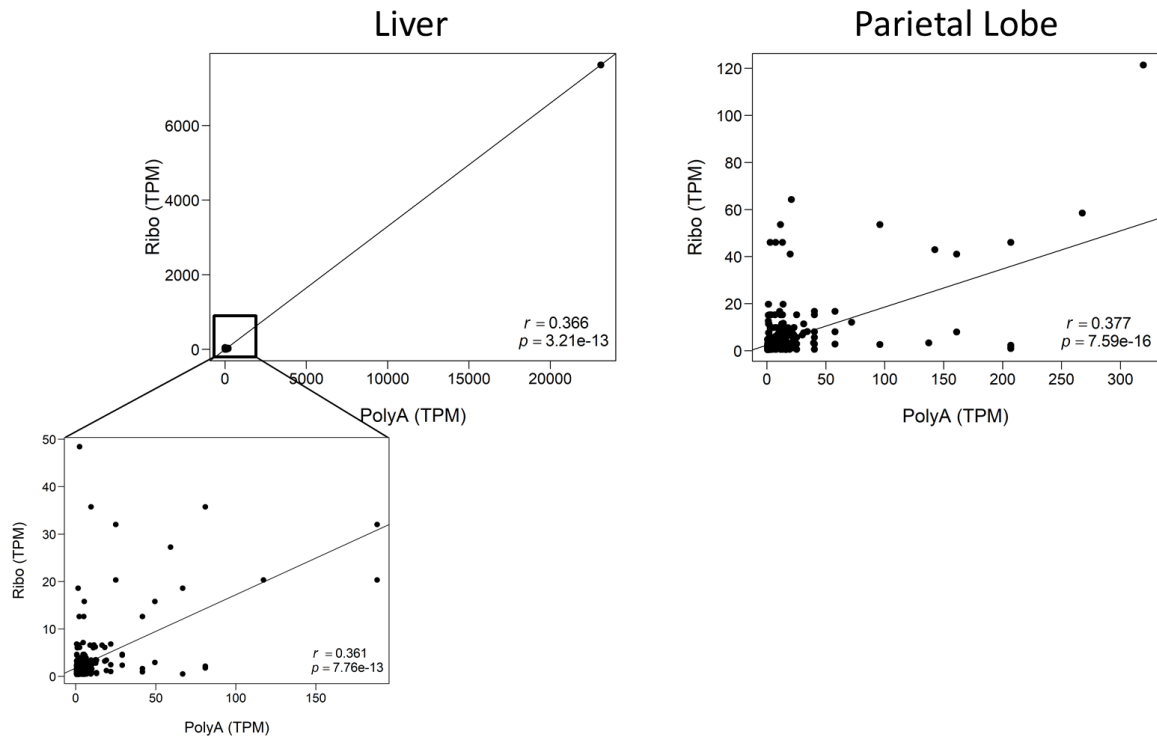

Figure S5: Correlation plots for lncRNA expression in AH2 with RefSeq annotated lncRNA. Correlation plots for lncRNA expression in AH2 with RefSeq annotated lncRNA. The x-axis indicates expression of the individual lncRNA in the poly-A<sup>+</sup> selected library. The y-axis shows expression of the same lncRNAs in the rRNA-depleted library. A) Liver B) Parietal Lobe of the Cerebrum. Spearman correlation ( $r$ ) and p-value in bottom right corner.

Table S5: qRT-PCR primer sequences.

| qRT-PCR Primer Sequences |                        |                       |
|--------------------------|------------------------|-----------------------|
| Transcript               | Forward Primer         | Reverse Primer        |
| <i>H19</i>               | GAAGAAGTCCGGGTTC       | CCCAAGAACCCTCAAGATGA  |
| <i>LINC02586</i>         | TCTGTCACAGTCACCGAAGC   | ACCATCCAGATGGACAAGGA  |
| <i>MIR124-2HG</i>        | AGAGCCGGTCTAGCTCAGAGA  | GAGACGCGGATTACCCAAAC  |
| <i>LINC01351</i>         | TATCCCGATACCGCACAAAC   | TTCCACTCTACCTTTCCTCCT |
| <i>ACTB</i>              | AAGGAGAAGCTCTGCTATGTCG | GGGCAGCTCGTAGCTCTTC   |
